# Supplementary material for: La@[La5&B30]0/−/2−: endohedral trihedral metallo-borospherenes with spherical aromaticity
Source: Royal Society of Chemistry journal article supplement (doi:10.1039/d1cp05644a), 2022-01-01
Supplement: d1cp05644a1.pdf [file d1cp05644a1.pdf]

## Supporting information

### La@[La<sub>5</sub>B<sub>30</sub>] 0<sup>-</sup>/-2<sup>-</sup>: Endohedral Trihedral Metallo-Borosphenes With Spherical Aromaticity

Mei-Zhen Ao,<sup>a,b</sup> Xiao-Qin Lu,<sup>a</sup> Wen-Yan Zan,<sup>\*a</sup> Yue-Wen Mu,<sup>\*a</sup> and Si-Dian Li<sup>\*a</sup>

<sup>a</sup>Nanocluster Laboratory, Institute of Molecular Science Shanxi University, Taiyuan 030006, P.R. China.

<sup>b</sup>Fenyang College of Shanxi Medical University, Fenyang 032200, China

\*E-mail: zanwy@sxu.edu.cn, ywmu@sxu.edu.cn and lisidian@sxu.edu.cn

### Table of Contents

**Figure S1.** Relative energies of low-lying isomers of La<sub>6</sub>B<sub>30</sub>.

**Figure S2.** Relative energies of low-lying isomers of La<sub>6</sub>B<sub>30</sub><sup>-</sup>.

**Figure S3.** Relative energies of low-lying isomers of La<sub>6</sub>B<sub>30</sub><sup>2-</sup>.

**Figure S4.** Eigenvalue spectra of La@[La<sub>5</sub>B<sub>30</sub>] (**1**) and La@[La<sub>5</sub>B<sub>30</sub>]<sup>2-</sup> (**3**) at PBE0 Level, with the HOMO-LUMO energy gaps indicated in eV.

**Figure S5.** Gibbs free energies  $\Delta G_f$  (eV) of the four lowest-lying isomers of La<sub>6</sub>B<sub>30</sub> as a function of temperature between 0 to 400 K at PBE0 level.

**Figure S6.** Gibbs free energies  $\Delta G_f$  (eV) of the four lowest-lying isomers of La<sub>6</sub>B<sub>30</sub><sup>-</sup> as a function of temperature from 0 to 400 K at PBE0 level.

**Figure S7.** Gibbs free energies  $\Delta G_f$  (eV) of the four lowest-lying isomers of La<sub>6</sub>B<sub>30</sub><sup>2-</sup> as a function of temperature from 0 to 400 K at PBE0 level.

**Figure S8.** MD simulations of *D*<sub>3h</sub> La@[La<sub>5</sub>B<sub>30</sub>] (**1**) at 1000 K.

**Figure S9.** MD simulations of *D*<sub>3h</sub> La@[La<sub>5</sub>B<sub>30</sub>]<sup>2-</sup> (**3**) at 1000 K.

**Figure S10.** Phonon dispersion curves and density of states (PhDOS) of 1D La<sub>4</sub>B<sub>21</sub> (**4**) nanowire.

**Figure S11.** Band structure and projected density of states (PDOS) of 1D La<sub>4</sub>B<sub>21</sub> (**4**) nanowire.

**Figure S12.** Side and top views of the ico-chemical shielding surfaces (ICSSs) of (a)

La@[La<sub>5</sub>&B<sub>30</sub>]<sup>-</sup> (**2**), and (b) C<sub>6</sub>H<sub>6</sub> based on their calculated NICS-ZZ components.

**Table S1.** Optimized coordinates (x, y, z) of *D*<sub>3h</sub> La@[La<sub>5</sub>&B<sub>30</sub>] (**1**, <sup>3</sup>A<sub>1</sub>') at PBE0 level.

**Table S2.** Optimized coordinates (x, y, z) of *C*<sub>s</sub> La@[La<sub>5</sub>&B<sub>30</sub>]<sup>-</sup> (**2**, <sup>2</sup>A') at PBE0 level.

**Table S3.** Optimized coordinates (x, y, z) of *D*<sub>3h</sub> La@[La<sub>5</sub>&B<sub>30</sub>]<sup>2-</sup> (**3**, <sup>1</sup>A<sub>1</sub>') at PBE0 level.

**Table S4.** Optimized fractional coordinates (x, y, z) of 1D La<sub>4</sub>B<sub>21</sub> (**4**) nanowire.

**Figure S1.** Relative energies of the thirty lowest-lying isomers of  $\text{La}_6\text{B}_{30}$  at PBE0, TPSSh (parentheses) and CCSD(T) (square brackets) levels in eV.

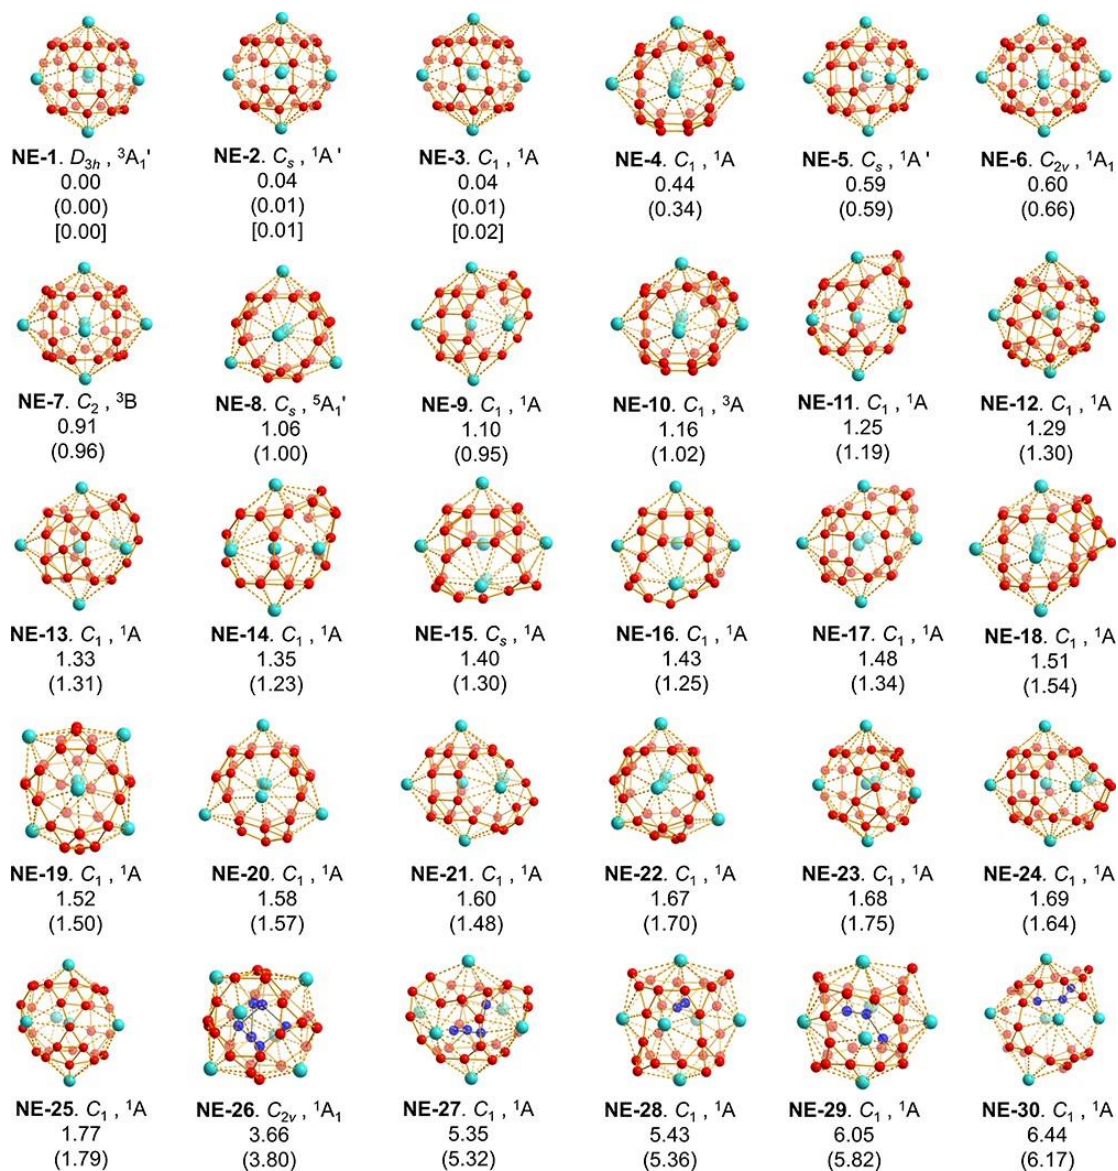

**Figure S2.** Relative energies of the twelve lowest-lying isomers of  $\text{La}_6\text{B}_{30}^-$  at PBE0 and TPSSh (parentheses) level in eV.

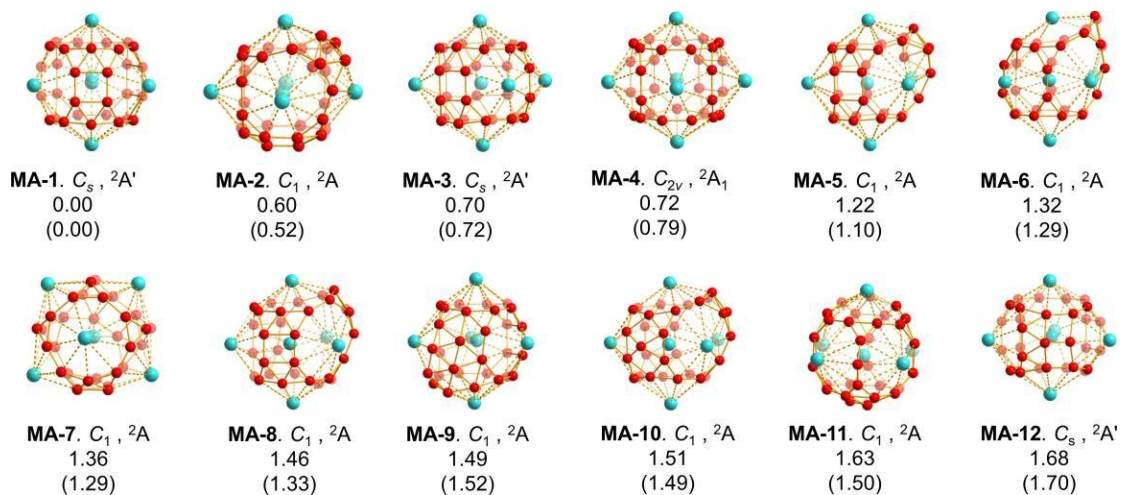

**Figure S3.** Relative energies of the eighteen lowest-lying isomers of  $\text{La}_6\text{B}_{30}^{2-}$  at PBE0 and TPSSh (parentheses) level in eV.

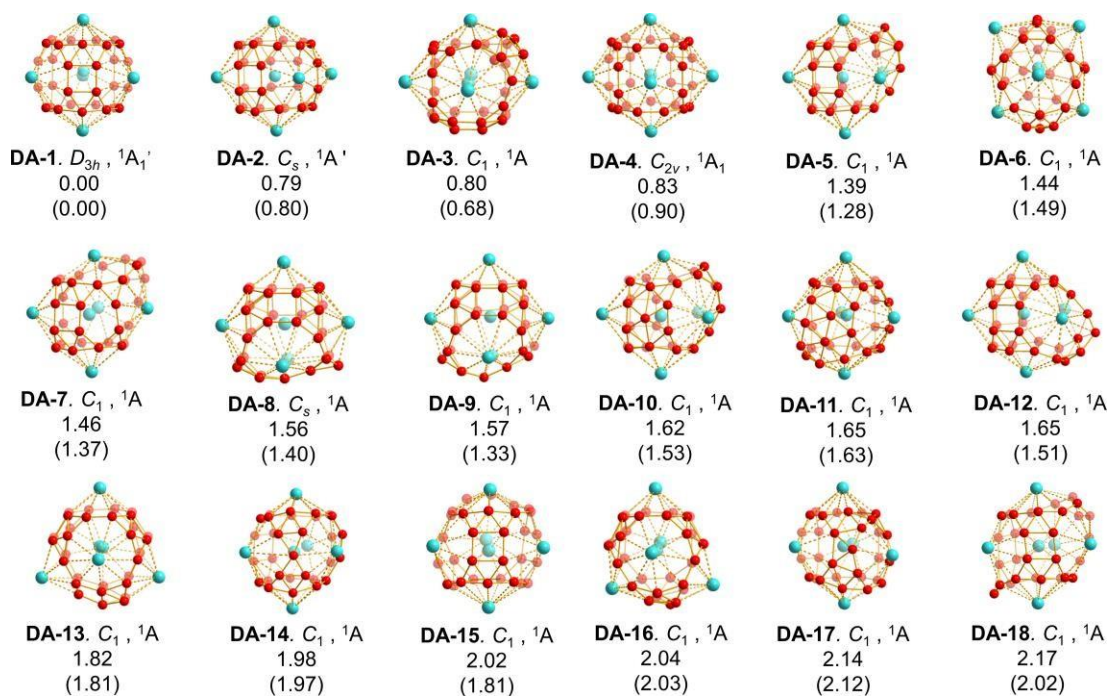

**Figure S4.** Eigenvalue spectra of  $\text{La}@\text{[La}_5\&\text{B}_{30}\text{]}$  (1) (left) and  $\text{La}@\text{[La}_5\&\text{B}_{30}\text{]}^{2-}$  (3) (right) at PBE0/B/6-311+G(d)/La/ECP46MWB level, with the HOMO-LUMO energy gaps indicated in eV.

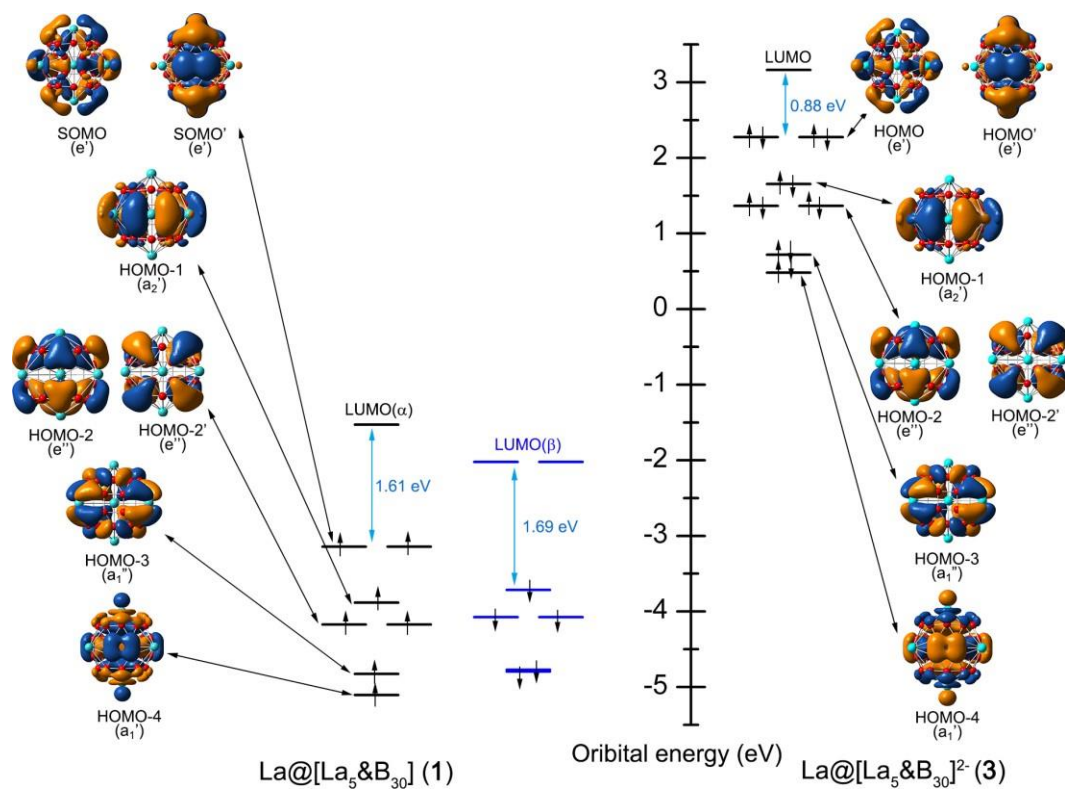

**Figure S5.** Gibbs free energies  $\Delta G_f$  (eV) of the four lowest-lying isomers of  $\text{La}_6\text{B}_{30}$  at PBE0/B/6-311+G(d)/La/ECP46MWB level as a function of temperature between 0 to 400 K relative to  $D_{3h}$   $\text{La}@[La_5\&B_{30}]$  (1) (NE-1).

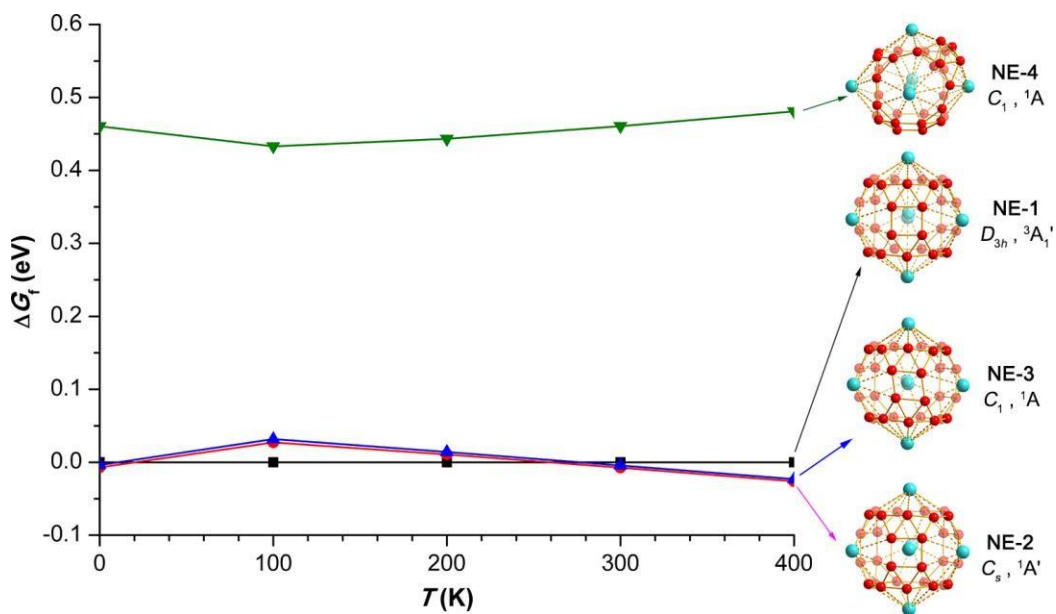

**Figure S6.** Gibbs free energies  $\Delta G_f$  (eV) of the four lowest-lying isomers of La  $B_{30}^-$  at PBE0/B/6-311+G(d)/La/ECP46MWB level as a function of temperature between 0 to 400 K relative to  $C_s$  La@[La<sub>5</sub>&B<sub>30</sub>]<sup>-</sup> (2) (MA-1).

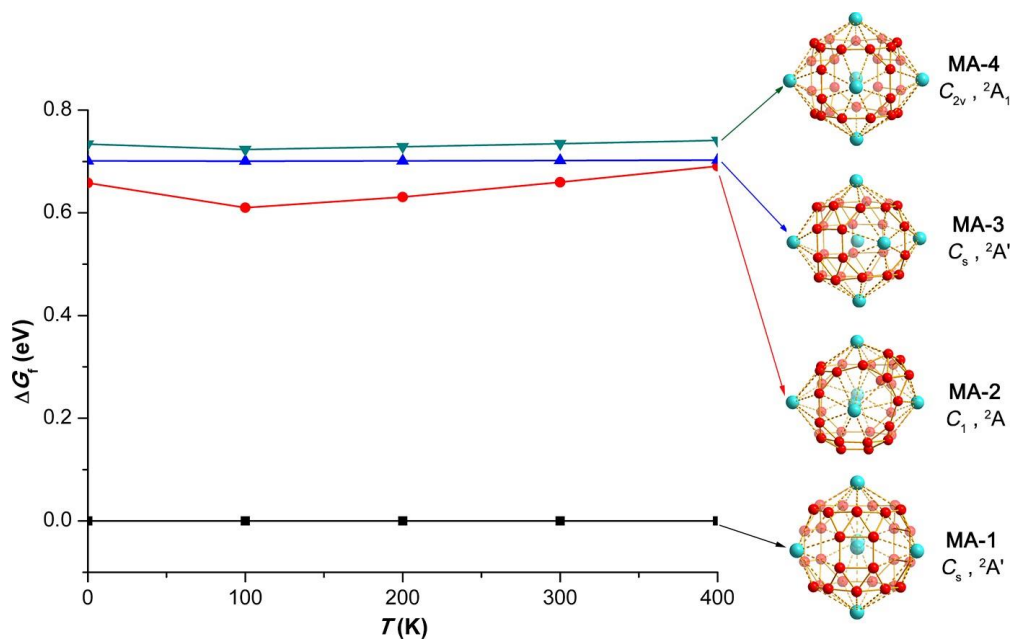



**Figure S7.** Gibbs free energies  $\Delta G_f$  (eV) of the four lowest-lying isomers of La  $B_{30}^-$  at PBE0/B/6-311+G(d)/La/ECP46MWB level as a function of temperature between 0 to 400 K relative to  $D_{3h} D_{3h}$  La@[La<sub>5</sub>&B<sub>30</sub>]<sup>2-</sup> (**DA-1**).

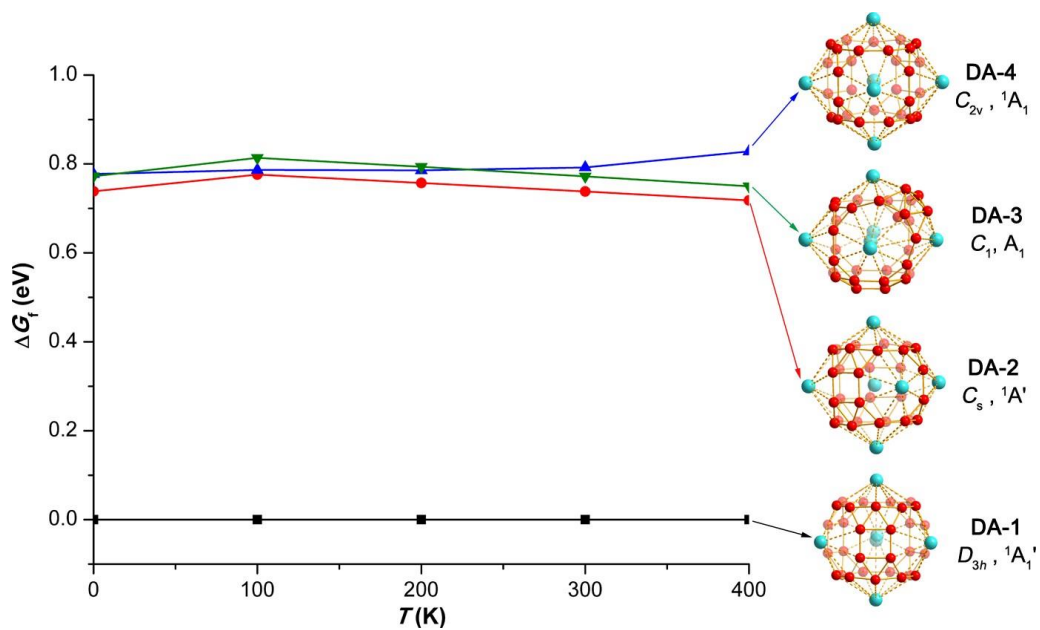

**Figure S8.** MD simulations of  $D_{3h}$  La@[La<sub>5</sub>&B<sub>30</sub>] (1) at 1000 K. The calculated root-mean-square-deviation (RMSD) and maximum bond length deviation (MAXD) values (on average) are indicated in Å.

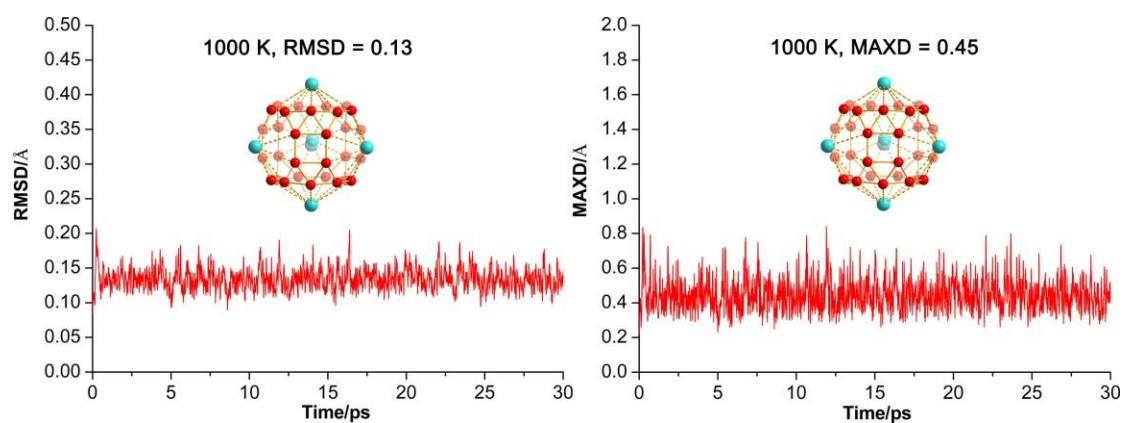

**Figure S9.** MD simulations of  $D_{3h}$  La@[La<sub>5</sub>&B<sub>30</sub>]<sup>2-</sup> (**3**) at 1000 K. The calculated root-mean-square-deviation (RMSD) and maximum bond length deviation (MAXD) values (on average) are indicated in Å.

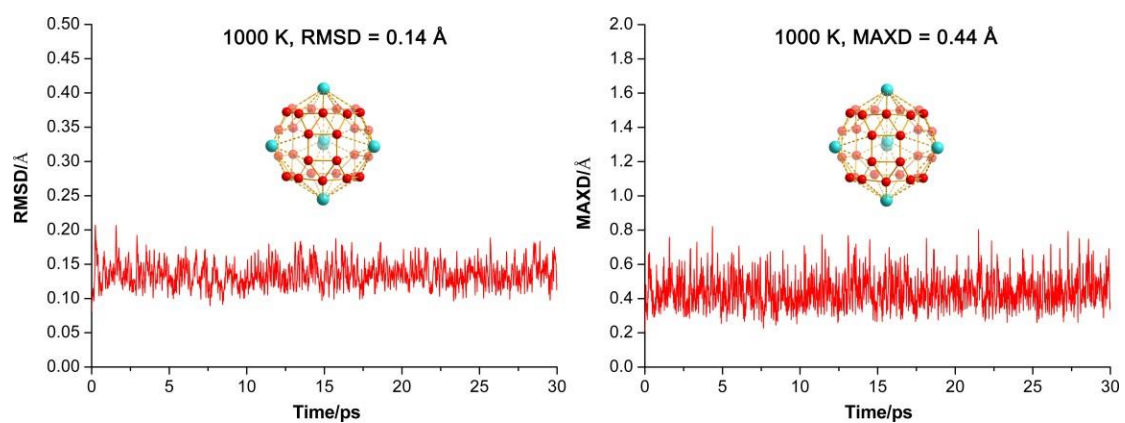

**Figure S10.** The phonon dispersion frequencies of 1D  $\text{La}_4\text{B}_{21}$  (4) nanowire.

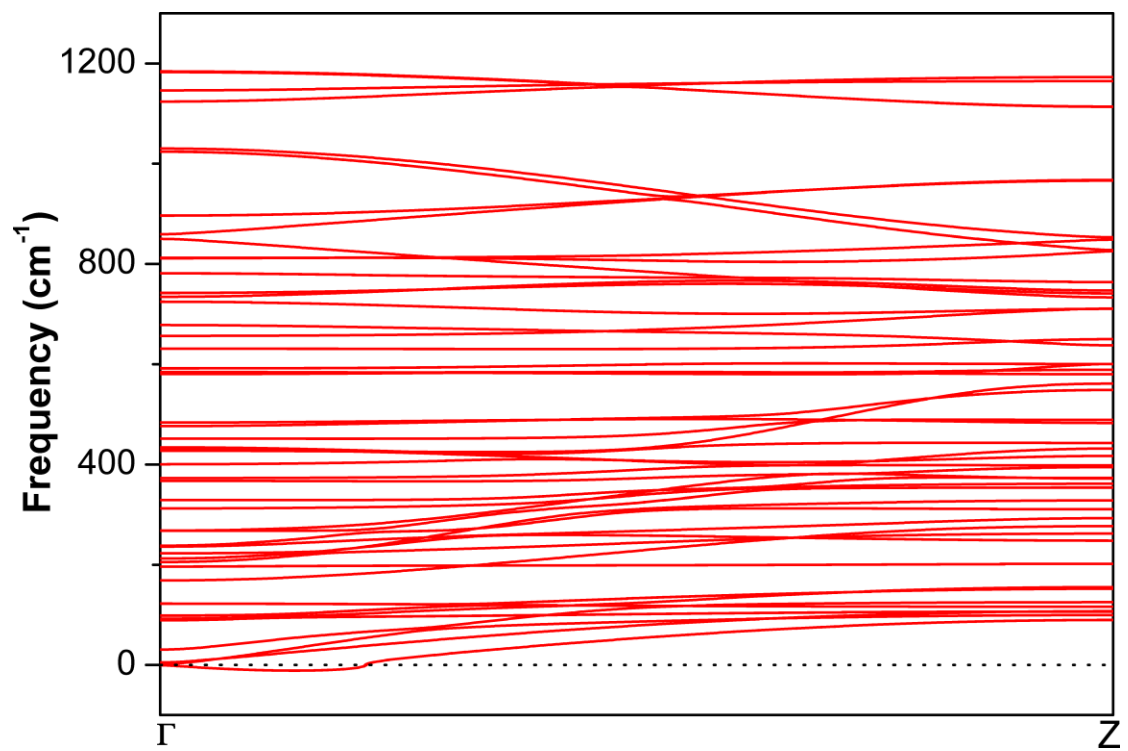

**Figure S11.** Band structure and projected density of states (PDOS) of 1D  $\text{La}_4\text{B}_{21}$  (4) nanowire at PBE level.

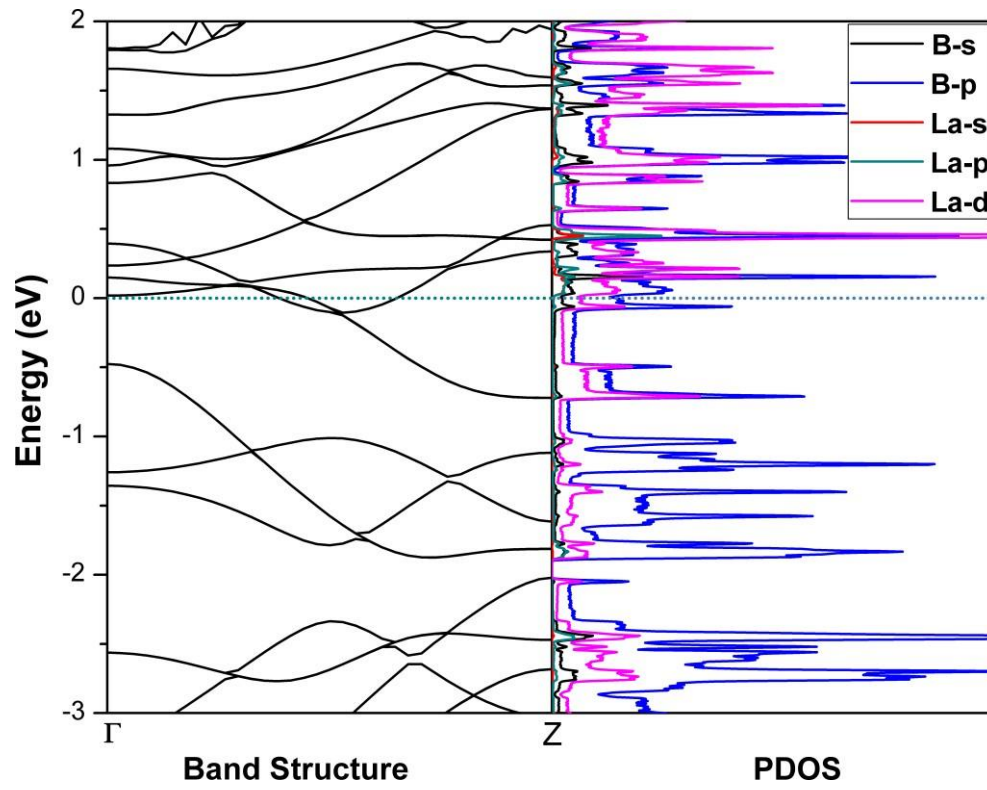

**Figure S12.** Side and top views of the ico-chemical shielding surfaces (ICSSs) of (a)  $\text{La}@[La_5\&B_{30}]^-$  (**2**), and (b)  $\text{C}_6\text{H}_6$  based on their calculated NICS-ZZ components. Yellow and green regions stand for chemical shielding and de-shielding areas, respectively.

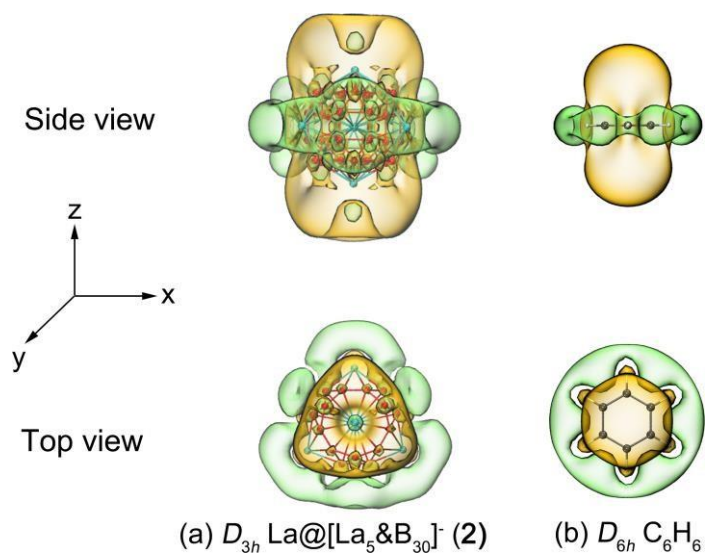

**Table S1.** Optimized coordinates (x, y, z) of  $D_{3h}$  La@[La<sub>5</sub>&B<sub>30</sub>] ( $1, ^3A_1'$ ) at PBE0/B/6-311+G(d)/La/ECP46MWB level.

|    |             |             |             |
|----|-------------|-------------|-------------|
| B  | 0.80453200  | 2.24843100  | 2.06020900  |
| B  | 1.96768200  | 2.18501300  | -0.84226200 |
| B  | -0.80453200 | 2.24843100  | 2.06020900  |
| B  | 2.87611800  | 0.61155600  | 0.84226200  |
| B  | -2.87611800 | 0.61155600  | -0.84226200 |
| B  | 1.96768200  | 2.18501300  | 0.84226200  |
| B  | 2.03308900  | 1.17380500  | 2.16656900  |
| B  | -1.96768200 | 2.18501300  | 0.84226200  |
| B  | -2.03308900 | 1.17380500  | 2.16656900  |
| La | 0.00000000  | 3.77530500  | 0.00000000  |
| B  | -1.96768200 | 2.18501300  | -0.84226200 |
| B  | -2.87611800 | 0.61155600  | 0.84226200  |
| B  | -0.80453200 | 2.24843100  | -2.06020900 |
| B  | -2.03308900 | 1.17380500  | -2.16656900 |
| B  | 0.80453200  | 2.24843100  | -2.06020900 |
| B  | 2.03308900  | 1.17380500  | -2.16656900 |
| B  | 2.87611800  | 0.61155600  | -0.84226200 |
| La | 0.00000000  | 0.00000000  | 0.00000000  |
| B  | 0.90843600  | -2.79656900 | -0.84226200 |
| B  | 2.34946400  | -0.42747000 | -2.06020900 |
| B  | 1.54493200  | -1.82096100 | -2.06020900 |
| B  | 1.54493200  | -1.82096100 | 2.06020900  |
| La | 3.26951000  | -1.88765300 | 0.00000000  |
| B  | 2.34946400  | -0.42747000 | 2.06020900  |
| B  | -2.34946400 | -0.42747000 | 2.06020900  |
| B  | -0.90843600 | -2.79656900 | -0.84226200 |
| B  | -1.54493200 | -1.82096100 | 2.06020900  |
| B  | -1.54493200 | -1.82096100 | -2.06020900 |
| La | -3.26951000 | -1.88765300 | 0.00000000  |
| B  | -2.34946400 | -0.42747000 | -2.06020900 |
| B  | -0.90843600 | -2.79656900 | 0.84226200  |
| B  | 0.90843600  | -2.79656900 | 0.84226200  |
| B  | 0.00000000  | -2.34760900 | 2.16656900  |
| B  | 0.00000000  | -2.34760900 | -2.16656900 |
| La | 0.00000000  | 0.00000000  | 3.53305600  |
| La | 0.00000000  | 0.00000000  | -3.53305600 |

**Table S2.** Optimized coordinates (x, y, z) of  $C_3La@[La_5B_{30}]^-$  ( $2, ^2A'$ ) at PBE0/B/6-311+G(d)/La/ECP46MWB level.

|    |             |             |             |
|----|-------------|-------------|-------------|
| B  | -1.51491900 | 1.84955300  | 2.07573600  |
| B  | -0.85894500 | 2.80011800  | -0.84235400 |
| B  | -2.36025300 | 0.47576800  | 2.10446200  |
| B  | 0.96912700  | 2.76389900  | 0.84222000  |
| B  | -2.02709000 | -2.12958900 | -0.84306500 |
| B  | -0.85894500 | 2.80011800  | 0.84235400  |
| B  | 0.04635600  | 2.34630600  | 2.16927300  |
| B  | -2.88068100 | -0.53953000 | 0.83477900  |
| B  | -2.06331600 | -1.12492700 | 2.18808300  |
| La | -3.22679800 | 1.93473700  | 0.00000000  |
| B  | -2.88068100 | -0.53953000 | -0.83477900 |
| B  | -2.02709000 | -2.12958900 | 0.84306500  |
| B  | -2.36025300 | 0.47576800  | -2.10446200 |
| B  | -2.06331600 | -1.12492700 | -2.18808300 |
| B  | -1.51491900 | 1.84955300  | -2.07573600 |
| B  | 0.04635600  | 2.34630600  | -2.16927300 |
| B  | 0.96912700  | 2.76389900  | -0.84222000 |
| La | 0.00207200  | 0.00534900  | 0.00000000  |
| B  | 2.85700800  | -0.65165100 | -0.83483800 |
| B  | 1.58690900  | 1.78895800  | -2.07651900 |
| B  | 2.37703700  | 0.38287700  | -2.10435200 |
| B  | 2.37703700  | 0.38287700  | 2.10435200  |
| La | 3.30112000  | 1.80717700  | 0.00000000  |
| B  | 1.58690900  | 1.78895800  | 2.07651900  |
| B  | -0.85359100 | -2.21918000 | 2.06118400  |
| B  | 1.94093600  | -2.20788300 | -0.84320800 |
| B  | 0.76460200  | -2.25069600 | 2.06072200  |
| B  | 0.76460200  | -2.25069600 | -2.06072200 |
| La | -0.07437400 | -3.73931700 | 0.00000000  |
| B  | -0.85359100 | -2.21918000 | -2.06118400 |
| B  | 1.94093600  | -2.20788300 | 0.84320800  |
| B  | 2.85700800  | -0.65165100 | 0.83483800  |
| B  | 2.01662800  | -1.20477400 | 2.18723800  |
| B  | 2.01662800  | -1.20477400 | -2.18723800 |
| La | -0.00099300 | -0.01092500 | 3.51812300  |
| La | -0.00099300 | -0.01092500 | -3.51812300 |



**Table S3.** Optimized coordinates (x, y, z) of  $D_{3h}$  La@[La<sub>5</sub>&B<sub>30</sub>]<sup>2-</sup> (**3**, <sup>1</sup>A<sub>1</sub>') at PBE0/B/6-311+G(d)/La/ECP46MWB level.

|    |             |             |             |
|----|-------------|-------------|-------------|
| B  | 0.81051700  | 2.25761800  | 2.10126100  |
| B  | 1.95664700  | 2.17472300  | -0.83886500 |
| B  | -0.81051700 | 2.25761800  | 2.10126100  |
| B  | 2.86168900  | 0.60714400  | 0.83886500  |
| B  | -2.86168900 | 0.60714400  | -0.83886500 |
| B  | 1.95664700  | 2.17472300  | 0.83886500  |
| B  | 2.03288600  | 1.17368700  | 2.19463100  |
| B  | -1.95664700 | 2.17472300  | 0.83886500  |
| B  | -2.03288600 | 1.17368700  | 2.19463100  |
| La | 0.00000000  | 3.74001400  | 0.00000000  |
| B  | -1.95664700 | 2.17472300  | -0.83886500 |
| B  | -2.86168900 | 0.60714400  | 0.83886500  |
| B  | -0.81051700 | 2.25761800  | -2.10126100 |
| B  | -2.03288600 | 1.17368700  | -2.19463100 |
| B  | 0.81051700  | 2.25761800  | -2.10126100 |
| B  | 2.03288600  | 1.17368700  | -2.19463100 |
| B  | 2.86168900  | 0.60714400  | -0.83886500 |
| La | 0.00000000  | 0.00000000  | 0.00000000  |
| B  | 0.90504200  | -2.78186700 | -0.83886500 |
| B  | 2.36041300  | -0.42688000 | -2.10126100 |
| B  | 1.54989600  | -1.83073700 | -2.10126100 |
| B  | 1.54989600  | -1.83073700 | 2.10126100  |
| La | 3.23894700  | -1.87000700 | 0.00000000  |
| B  | 2.36041300  | -0.42688000 | 2.10126100  |
| B  | -2.36041300 | -0.42688000 | 2.10126100  |
| B  | -0.90504200 | -2.78186700 | -0.83886500 |
| B  | -1.54989600 | -1.83073700 | 2.10126100  |
| B  | -1.54989600 | -1.83073700 | -2.10126100 |
| La | -3.23894700 | -1.87000700 | 0.00000000  |
| B  | -2.36041300 | -0.42688000 | -2.10126100 |
| B  | -0.90504200 | -2.78186700 | 0.83886500  |
| B  | 0.90504200  | -2.78186700 | 0.83886500  |
| B  | 0.00000000  | -2.34737500 | 2.19463100  |
| B  | 0.00000000  | -2.34737500 | -2.19463100 |
| La | 0.00000000  | 0.00000000  | 3.51110500  |
| La | 0.00000000  | 0.00000000  | -3.51110500 |

**Table S4.** Optimized fractional coordinates (x, y, z) of 1D La<sub>4</sub>B<sub>21</sub> (**4**) nanowire at PBE level.

|    |                      |                     |                     |
|----|----------------------|---------------------|---------------------|
|    | 34.7623263024369464  | -0.0037103936372768 | 0.0053697325008126  |
|    | -17.3843731436830922 | 30.1100482126263138 | -0.0048079227471372 |
|    | 0.0006665636019442   | -0.0003024596182199 | 4.4370652451652273  |
| B  | La                   |                     |                     |
| 21 | 4                    |                     |                     |
|    | 0.5224592918596261   | 0.6254264817409362  | 0.9896625959311190  |
|    | 0.5522889666654875   | 0.6295724703335202  | 0.3104362083764923  |
|    | 0.5867764599825427   | 0.6024999529082078  | 0.6777937495049429  |
|    | 0.4029085946912579   | 0.5080085721366879  | 0.3104998036490051  |
|    | 0.5551323717812721   | 0.6331372921064196  | 0.6779315518371957  |
|    | 0.5614496737495117   | 0.6082124069822457  | 0.9911003439693392  |
|    | 0.4299967408886526   | 0.5695721242593303  | 0.6780707112541254  |
|    | 0.4242755949154859   | 0.5385337797565303  | 0.9912531868984529  |
|    | 0.4328811473290442   | 0.5689206417184052  | 0.3105651242709059  |
|    | 0.3993514661695243   | 0.5072921559289154  | 0.6779981600363576  |
|    | 0.5832398189599132   | 0.5996114872801365  | 0.3102970815834436  |
|    | 0.5244796270251985   | 0.4802147829537784  | 0.3101917285681349  |
|    | 0.5796829356167068   | 0.5700187746029498  | 0.9894281524889664  |
|    | 0.4070568630640384   | 0.4823312198332277  | 0.9896230238753436  |
|    | 0.4635655661245760   | 0.4492694479351648  | 0.3102856910611972  |
|    | 0.4375169966203097   | 0.4528198302592091  | 0.9895251385930619  |
|    | 0.4629121992173481   | 0.4457306194052912  | 0.6777742060423625  |
|    | 0.5251955306799815   | 0.4773712749845935  | 0.6776847603365015  |
|    | 0.4939506549782170   | 0.4710488828293640  | 0.9909858796693893  |
|    | 0.4624780233080154   | 0.5949632089173467  | 0.9897244507077025  |
|    | 0.5501634821723542   | 0.5100432719650027  | 0.9893759743163675  |
|    | 0.4920645556303757   | 0.6481555363748028  | 0.4915080451662049  |
|    | 0.4932284716647780   | 0.5392686809017450  | 0.6127949791951457  |
|    | 0.6032993172071554   | 0.5404415810714001  | 0.4910618641458554  |
|    | 0.3843153736986520   | 0.4292051288147651  | 0.4913377935223999  |
